# Supplementary material
Source: publisher figshare collection journal article supplement (https://gsapubs.figshare.com/ndownloader/files/22745504)
Supplement: Supplementary file 1 [file 22745504]

**APPENDIX DR1: STATISTICAL ANALYSIS OF SITE-MEAN DIRECTIONS**

**Northern Margin of Salient:**

For the seven sites from the Ankareh Formation, the clustering of site-mean directions (Table DR1) is improved by restoring bedding to horizontal ( $k = 46.3$  in geographic coordinates and  $k = 64.4$  in stratigraphic coordinates), but this improvement is not statistically significant, and the fold test is indeterminate (McFadden, 1990). Incremental unfolding indicates that maximum  $k$  value occurs at 100% unfolding. The five normal- and two reversed-polarity site-mean directions formally fail the reversal test; the angle between the mean of the normal-polarity sites and the antipode of the reversed-polarity sites is  $11.6^\circ$ , and the critical angle is  $10.5^\circ$ . However, the five normal-polarity sites were collected from an exposure along the South Fork of Willow Creek, whereas the two reversed-polarity sites are from the North Fork of Willow Creek. The small difference in declination that results in failure of the reversal test is almost certainly due to a small relative vertical-axis rotation between the two exposures of the Ankareh Formation sampled within the northern margin.

For the 16 sites from the Woodside Shale, the fold test is indeterminate ( $k = 48.2$  in geographic coordinates;  $k = 51.3$  in stratigraphic coordinates; and maximum  $k = 52.6$  occurs at 66% unfolding), but the site-mean directions pass the reversal test with Class C (McFadden and McElhinny, 1990).

**Central Part of Salient**

Statistical analysis of the 22 sites from the Ankareh Formation near Thistle, Utah indicates that restoring bedding to horizontal results in an improved clustering of site-mean directions (from 57.3 to 67.1), but this increase is not statistically significant, and the fold test is indeterminate (McFadden, 1990). Incremental unfolding indicates that maximum  $k$  value occurs at 100% unfolding. Applying the reversal test of McFadden and McElhinny (1990) yields a critical angle of  $7.6^\circ$ , whereas the angle between the mean of the normal-polarity sites and the antipode of the mean of reversed-polarity sites is  $11.7^\circ$ . However, the reversed-polarity sites have a very tight clustering of site-mean directions ( $k = 112.3$ ) probably because of time integration of the geomagnetic field during acquisition of chemical remanent magnetization. All reversed-polarity sites are from the railcut part of the section, whereas the roadcut part of the section contains only normal-polarity sites. Thus, failure of the reversal test probably results from a small relative vertical-axis rotation between the two parts of the sampled section.

**Southern Margin of Salient**

Statistical analysis of the nine acceptable site-mean ChRM directions of the Woodside Shale near Rees Flat indicates improved grouping when bedding is restored to horizontal ( $k = 48.9$  in geographic coordinates and  $k = 90.2$  in stratigraphic coordinates), but the improvement is not statistically significant (McFadden, 1990). Incremental unfolding analysis shows maximum  $k$  occurs at 100% unfolding.

**REFERENCES CITED**

- McFadden, P.L., 1990, A new fold test for palaeomagnetic studies: *Geophysical Journal International*, v. 103, p. 163–169.
- McFadden, P.L., and McElhinny, M.W., 1990, Classification of the reversal test in palaeomagnetism: *Geophysical Journal International*, v. 103, p. 725–729.

Fig. DR1, Conder et al.

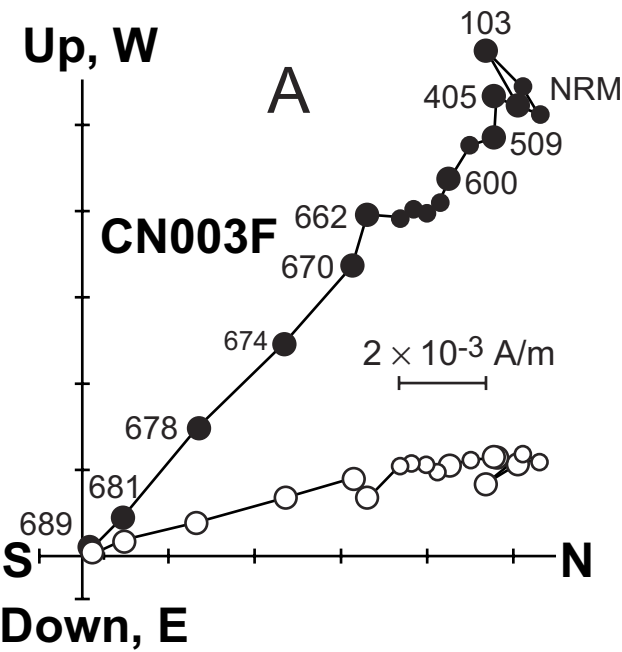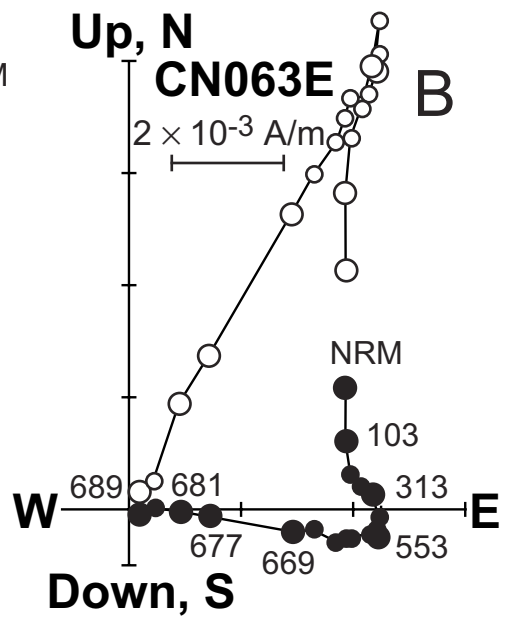

Figure DR1. Vector-component diagrams of thermal demagnetization behavior. A: Sample from Ankareh Formation in northern margin of Charleston-Nebo salient. B: Sample from Woodside Shale in southern margin of salient. Open circles—projections onto vertical plane; filled circles—projections onto horizontal plane. Numbers adjacent to larger data points indicate temperatures (in °C). Directions are shown in geographic (in situ) coordinates.

Table DR1. SITE-MEAN DIRECTIONS OF CHARACTERISTIC MAGNETIZATION

| Site No.                                                          | N | k     | J<br>( $10^{-3}$ A/m) | $\zeta_{95\#}$<br>( $^{\circ}$ ) | Geographic          |                     | Bedding               |                       | Stratigraphic       |                     |
|-------------------------------------------------------------------|---|-------|-----------------------|----------------------------------|---------------------|---------------------|-----------------------|-----------------------|---------------------|---------------------|
|                                                                   |   |       |                       |                                  | I<br>( $^{\circ}$ ) | D<br>( $^{\circ}$ ) | Dip<br>( $^{\circ}$ ) | Az.<br>( $^{\circ}$ ) | I<br>( $^{\circ}$ ) | D<br>( $^{\circ}$ ) |
| Northern Limb of Charleston - Nebo Salient                        |   |       |                       |                                  |                     |                     |                       |                       |                     |                     |
| Ankareh Fm, South Fork of Willow Creek (40°19.05'N, 111° 11.66'W) |   |       |                       |                                  |                     |                     |                       |                       |                     |                     |
| CN001                                                             | 6 | 104.9 | 1.9                   | 6.6                              | -16.4               | 336.9               | 75.0                  | 68.6                  | -2.6                | 322.3               |
| CN002                                                             | 6 | 51.0  | 4.7                   | 9.5                              | -8.7                | 331.6               | 75.0                  | 68.6                  | 4.5                 | 328.4               |
| CN003                                                             | 6 | 258.0 | 11.0                  | 4.2                              | -10.3               | 318.2               | 75.0                  | 68.6                  | 16.6                | 322.7               |
| CN004                                                             | 6 | 238.1 | 13.0                  | 4.4                              | -6.2                | 314.2               | 75.0                  | 68.6                  | 21.6                | 325.5               |
| CN005                                                             | 5 | 106.5 | 1.0                   | 7.4                              | -8.6                | 320.4               | 75.0                  | 68.6                  | 15.1                | 325.2               |
| Ankareh Fm, North Fork of Willow Creek (40°19.41'N, 111° 12.00'W) |   |       |                       |                                  |                     |                     |                       |                       |                     |                     |
| CN006                                                             | 6 | 159.5 | 4.9                   | 5.3                              | -5.9                | 145.8               | 57.5                  | 63.5                  | -9.7                | 154.4               |
| CN007                                                             | 6 | 151.9 | 1.3                   | 5.5                              | -7.9                | 149.8               | 57.5                  | 63.5                  | -7.4                | 158.2               |
| Woodside Fm, Bjorkman Hollow (40°20.68'N, 111° 13.03'W)           |   |       |                       |                                  |                     |                     |                       |                       |                     |                     |
| CN008                                                             | 6 | 769.3 | 4.0                   | 2.4                              | 47.3                | 157.6               | 125.1                 | 78.2                  | -31.6               | 129.7               |
| CN009                                                             | 6 | 512.3 | 9.8                   | 3.0                              | 49.4                | 169.0               | 125.1                 | 78.2                  | -25.4               | 124.2               |
| CN010                                                             | 6 | 36.2  | 3.3                   | 11.3                             | 49.9                | 165.8               | 125.1                 | 78.2                  | -27.5               | 124.7               |
| CN011                                                             | 6 | 133.1 | 8.3                   | 5.8                              | 49.0                | 184.4               | 125.1                 | 78.2                  | -16.5               | 119.2               |
| CN012                                                             | 5 | 203.7 | 13.0                  | 5.4                              | 44.7                | 173.9               | 125.1                 | 78.2                  | -20.3               | 127.1               |
| CN013                                                             | 6 | 219.8 | 10.0                  | 4.5                              | 40.7                | 174.4               | 125.1                 | 78.2                  | -18.0               | 130.6               |
| CN014                                                             | 6 | 251.2 | 17.0                  | 4.2                              | 43.9                | 178.4               | 125.1                 | 78.2                  | -17.1               | 126.1               |
| CN015                                                             | 6 | 43.2  | 12.0                  | 10.3                             | 49.6                | 192.3               | 125.1                 | 78.2                  | -12.8               | 115.5               |
| CN016                                                             | 6 | 16.4  | 6.4                   | 17.0                             | 40.0                | 188.1               | 125.1                 | 78.2                  | -9.0                | 125.1               |
| CN017                                                             | 6 | 131.1 | 35.0                  | 5.9                              | -41.6               | 2.3                 | 137.4                 | 76.7                  | 20.6                | 307.0               |
| CN018                                                             | 6 | 511.4 | 26.0                  | 3.0                              | -39.5               | 6.0                 | 137.4                 | 76.7                  | 17.2                | 306.3               |
| CN019                                                             | 6 | 103.6 | 48.0                  | 6.6                              | -27.9               | 348.6               | 137.4                 | 76.7                  | 19.0                | 325.8               |
| CN020                                                             | 6 | 200.7 | 44.0                  | 4.7                              | -27.5               | 341.9               | 137.4                 | 76.7                  | 23.0                | 330.5               |
| CN021                                                             | 6 | 138.9 | 31.0                  | 5.7                              | -28.0               | 347.1               | 137.4                 | 76.7                  | 19.9                | 326.6               |
| CN022                                                             | 7 | 76.5  | 38.0                  | 6.9                              | -32.8               | 355.2               | 137.4                 | 76.7                  | 18.3                | 317.9               |
| CN023                                                             | 6 | 110.9 | 20.0                  | 6.4                              | -40.4               | 19.0                | 137.4                 | 76.7                  | 11.6                | 297.8               |
| Ankareh Fm, North Bjorkman Hollow (40°20.83'N, 111° 12.49'W)      |   |       |                       |                                  |                     |                     |                       |                       |                     |                     |
| CN024*                                                            | 6 | 192.7 | 3.6                   | 4.8                              | 5.3                 | 341.0               | 150.0                 | 53.0                  | -13.5               | 309.9               |
| CN025*                                                            | 6 | 243.4 | 2.9                   | 4.3                              | 15.2                | 351.8               | 150.0                 | 53.0                  | -27.3               | 305.2               |

## Central Portion of Charleston – Nebo Salient

Ankareh Fm, Spanish Fork Canyon (40°1.23'N, 111° 29.94'W)

|       |   |       |      |      |      |       |      |       |       |       |
|-------|---|-------|------|------|------|-------|------|-------|-------|-------|
| CN026 | 6 | 36.8  | 2.3  | 11.2 | 11.7 | 334.0 | 28.6 | 89.8  | 22.5  | 342.4 |
| CN027 | 6 | 71.8  | 2.8  | 8.0  | 7.3  | 330.2 | 28.6 | 89.8  | 20.3  | 336.6 |
| CN028 | 5 | 675.4 | 4.0  | 2.9  | -0.3 | 167.2 | 30.4 | 100.1 | -11.7 | 170.2 |
| CN029 | 6 | 590.0 | 12.0 | 2.8  | 4.8  | 162.7 | 30.4 | 100.1 | -9.2  | 163.8 |
| CN030 | 6 | 79.5  | 3.8  | 7.6  | -5.9 | 156.3 | 30.4 | 100.1 | -21.6 | 162.9 |
| CN031 | 6 | 343.4 | 6.5  | 3.6  | 3.6  | 167.8 | 30.4 | 100.1 | -7.9  | 168.9 |
| CN032 | 6 | 65.8  | 7.3  | 8.3  | 8.2  | 169.0 | 30.4 | 100.1 | -3.3  | 167.8 |
| CN033 | 6 | 123.9 | 4.9  | 6.0  | 0.0  | 162.2 | 30.4 | 100.1 | -13.7 | 165.6 |
| CN034 | 6 | 41.1  | 7.8  | 10.6 | 6.2  | 164.2 | 30.4 | 100.1 | -7.3  | 164.5 |
| CN035 | 6 | 54.8  | 6.4  | 9.1  | 6.0  | 159.5 | 30.4 | 100.1 | -9.5  | 160.3 |
| CN036 | 5 | 65.8  | 0.9  | 9.5  | -3.1 | 175.1 | 30.4 | 100.1 | -10.2 | 178.7 |
| CN037 | 6 | 390.3 | 4.5  | 3.4  | 3.1  | 170.3 | 30.4 | 100.1 | -7.1  | 171.4 |
| CN038 | 6 | 314.2 | 9.9  | 3.8  | 4.9  | 171.2 | 30.4 | 100.1 | -5.1  | 171.3 |
| CN039 | 6 | 165.9 | 5.4  | 5.2  | 2.9  | 163.4 | 30.4 | 100.1 | -10.6 | 165.3 |
| CN040 | 6 | 251.8 | 1.6  | 4.2  | 2.5  | 169.0 | 30.4 | 100.1 | -8.3  | 170.5 |
| CN041 | 6 | 76.0  | 9.5  | 7.7  | 7.6  | 347.4 | 30.4 | 100.1 | 17.9  | 354.1 |
| CN043 | 4 | 108.5 | 1.1  | 8.9  | 5.4  | 171.7 | 30.4 | 100.1 | -4.5  | 171.4 |
| CN044 | 6 | 59.5  | 2.3  | 8.8  | 18.7 | 172.9 | 30.4 | 100.1 | 7.8   | 166.0 |
| CN047 | 6 | 229.0 | 5.1  | 4.4  | 3.8  | 322.5 | 28.6 | 89.8  | 20.4  | 327.6 |
| CN049 | 6 | 180.4 | 6.9  | 5.0  | -0.6 | 338.3 | 28.6 | 89.8  | 9.6   | 340.5 |
| CN050 | 6 | 133.7 | 8.7  | 5.8  | 0.3  | 341.7 | 28.6 | 89.8  | 8.8   | 343.9 |
| CN051 | 6 | 211.5 | 4.8  | 4.6  | 0.2  | 327.8 | 28.6 | 89.8  | 14.8  | 331.1 |

## Southern Limb of Charleston – Nebo Salient

Woodside Fm, Bear Canyon (39°47.42'N, 111° 43.58'W)

|        |   |       |     |     |       |       |       |       |       |       |
|--------|---|-------|-----|-----|-------|-------|-------|-------|-------|-------|
| CN052  | 6 | 50.0  | 1.7 | 9.6 | -65.1 | 62.7  | 119.5 | 109.5 | 11.3  | 307.8 |
| CN053  | 6 | 92.4  | 3.8 | 7.0 | -76.4 | 80.0  | 119.5 | 109.5 | 17.5  | 296.5 |
| CN054  | 6 | 179.8 | 3.3 | 5.0 | -61.3 | 56.0  | 119.5 | 109.5 | 10.6  | 312.6 |
| CN055  | 6 | 74.0  | 8.1 | 7.8 | -50.1 | 103.6 | 119.5 | 109.5 | -10.2 | 293.4 |
| CN056  | 6 | 362.4 | 8.6 | 3.5 | -56.6 | 101.6 | 119.5 | 109.5 | -3.7  | 293.9 |
| CN057* | 5 | 63.1  | 1.5 | 9.7 | 45.9  | 81.6  | 43.0  | 118.5 | 8.4   | 93.5  |

Woodside Fm, Rees Flat (39°44.71'N, 111° 47.19'W)

|        |   |      |     |     |       |      |       |       |      |      |
|--------|---|------|-----|-----|-------|------|-------|-------|------|------|
| CN058* | 6 | 90.1 | 4.4 | 7.1 | -68.7 | 45.2 | 123.1 | 194.3 | 50.4 | 31.3 |
|--------|---|------|-----|-----|-------|------|-------|-------|------|------|

|        |   |       |      |     |       |       |       |       |       |       |
|--------|---|-------|------|-----|-------|-------|-------|-------|-------|-------|
| CN059  | 6 | 229.9 | 9.3  | 4.4 | -50.1 | 114.8 | 123.1 | 194.3 | 18.7  | 56.0  |
| CN060  | 7 | 119.8 | 7.7  | 5.5 | -54.1 | 121.2 | 123.1 | 194.3 | 17.4  | 50.3  |
| CN061  | 6 | 126.7 | 10.0 | 6.0 | -61.5 | 125.8 | 123.1 | 194.3 | 19.5  | 42.4  |
| CN062  | 7 | 155.8 | 6.5  | 4.9 | -64.6 | 113.4 | 123.1 | 194.3 | 25.9  | 42.4  |
| CN063  | 6 | 66.4  | 8.9  | 8.3 | -60.5 | 111.1 | 123.1 | 194.3 | 25.2  | 47.0  |
| CN064  | 6 | 138.5 | 7.2  | 5.7 | -55.9 | 97.6  | 123.1 | 194.3 | 30.4  | 54.6  |
| CN065  | 6 | 79.5  | 4.3  | 7.6 | -67.2 | 129.8 | 123.1 | 194.3 | 21.3  | 36.4  |
| CN066* | 5 | 470.9 | 7.8  | 3.5 | 63.0  | 208.8 | 123.1 | 194.3 | -58.7 | 206.9 |
| CN067  | 6 | 86.0  | 5.7  | 7.3 | -52.0 | 148.1 | 146.4 | 204.8 | 28.0  | 60.4  |
| CN068  | 6 | 106.8 | 5.7  | 6.5 | -55.0 | 156.6 | 146.4 | 204.8 | 28.1  | 53.8  |

Notes: Site No. - Paleomagnetic site number (asterisks indicate sites rejected from calculation of locality-mean direction); N – number of samples used to determine site-mean direction; J – geometric mean intensity of characteristic remanent magnetization;  $\zeta_{95}$  - radius of cone of 95% confidence about site-mean direction; k – best-estimate of Fisher precision parameter; Geographic and Stratigraphic I and D - inclination and declination of site-mean direction in geographic coordinates (in situ) and stratigraphic coordinates (after restoration of local bedding to horizontal); Bedding Dip – angle of dip of bedding with horizontal; Bedding Az. – azimuth of down-dip direction of bedding plane.
